# Supplementary material for: Glucocorticoids increase adiposity by stimulating Krüppel-like factor 9 expression in macrophages
Source: Springer Nature journal article supplement (doi:10.1038/s41467-024-45477-8), 2024-02-08
Supplement: MOESM1 [file 41467_2024_45477_MOESM1_ESM.pdf]

## **Supplementary Materials:**

**Glucocorticoids increase adiposity by stimulating Krüppel-like factor 9 expression in macrophages**

## Supplementary Figures:

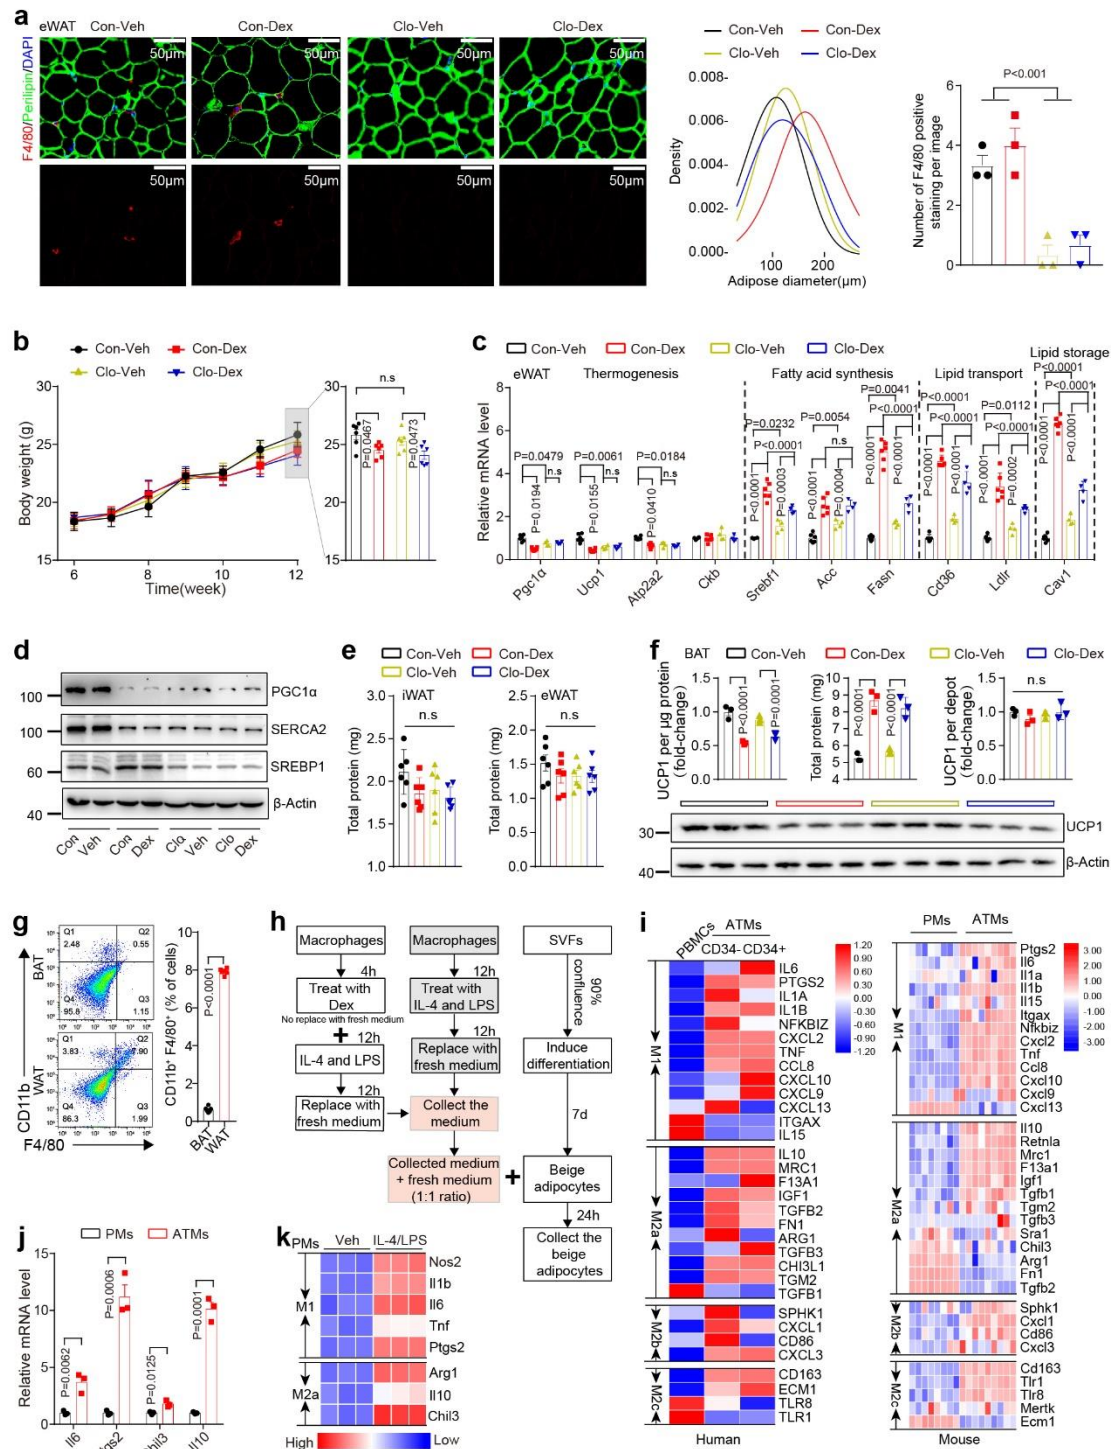

**Fig. S1: ATMs are involved in GC-induced obesity.**

**a**, Immunofluorescence staining of Perilipin-1 in eWAT of mice treated as in (**Fig. 1a**), scale bar = 50 μm, quantification of eWAT adipocyte size and quantification of F4/80 positive in per image are also shown (n = 3 mice). Representative images of three independent experiments with similar results.

- b**, Body weight of male mice treated as in (**Fig. 1a**) (n = 6 mice).
- c**, mRNA levels of indicated genes in eWAT of mice treated as in (**Fig. 1a**) (n = 6 mice).
- d**, protein levels of PGC1 $\alpha$ , SERCA2, and SREBP1 in eWAT of mice treated as in (**Fig. 1a**).
- e**, Quantification of total protein per depot of iWAT and eWAT from mice treated as in (**Fig. 1a**) (n = 6 mice).
- f**, Quantification of showing UCP1 per microgram protein, total protein per depot, and total UCP1 per depot of BAT from mice treated as in (**Fig. 1a**) (n = 3 mice).
- g**, Representative histograms from flow cytometry analysis of CD11b and F4/80 expression in SVFs of indicated AT in male C57BL/6J mice, amounts of CD11b<sup>+</sup> F4/80<sup>+</sup> cells are also quantified (n = 6 mice).
- h**, Schematic depicting the treatment of SVF-derived beige adipocytes with indicated CM from macrophages.
- i**, Heat map representation of macrophage polarization markers in human PBMCs and ATMs (left, data from GSE37660), mPMs and ATMs (right, data from GSE133127).
- j**, mRNA levels of macrophage polarization markers in mPMs and ATMs (n = 3 mice).
- k**, mRNA levels of polarization markers of mPMs treated with vehicle or IL-4 (20 ng/ml) and LPS (1 ng/ml) for 12 h (n = 3 mice).

Data are represented as mean  $\pm$  SEM., unpaired two-tailed Student's t tests were performed in **g** and **j**, one-way ANOVAs were performed in **a**, **b**, **e**, and **f**, or two-way ANOVAs were performed in **c**.

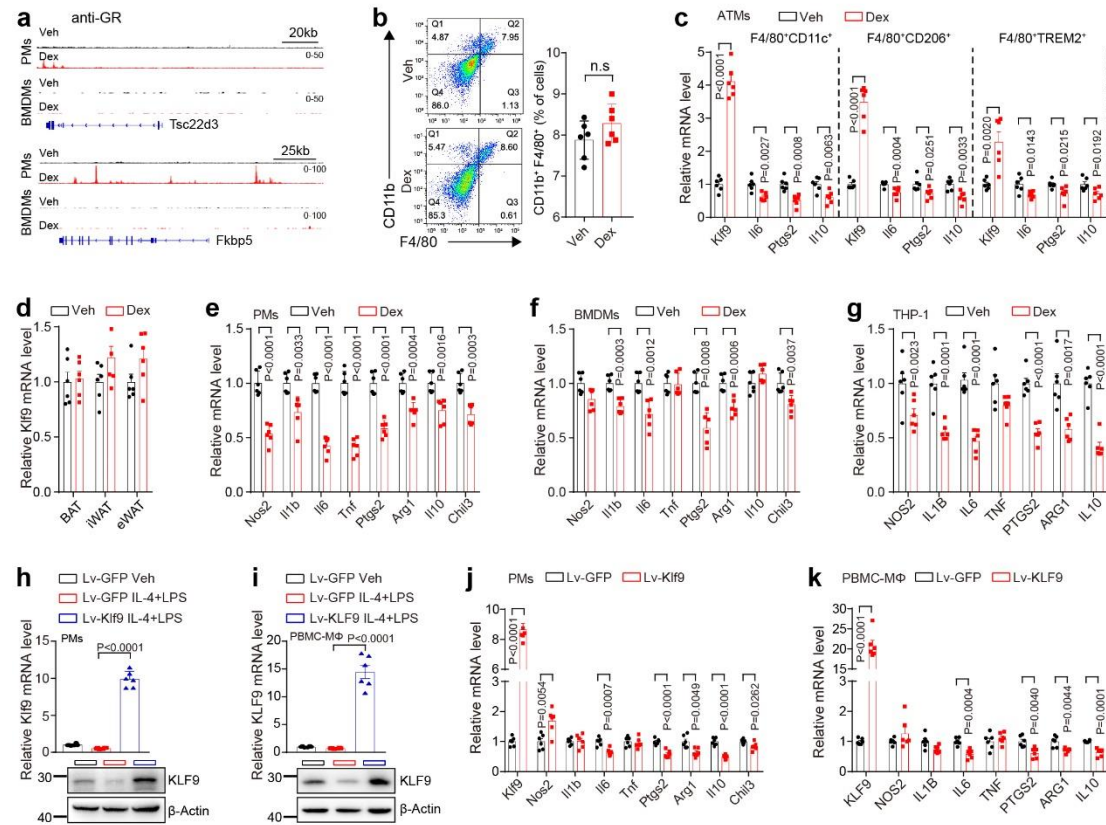

**Fig. S2: Dex treatment and *Klf9* overexpression promote macrophage deactivation.**

**a**, Genome browser shots of the GR ChIP-seq on *Tsc22d3* and *Fkbp5* loci in mPMs (GSE109131) and mBMDMs (GSE61877) treated with Dex or vehicle (Veh). Genomic coordinates in mm10.

**b**, Representative flow cytometry histograms from analysis of CD11b and F4/80 expression in SVFs of AT of mice after 6 weeks Dex exposure, amounts of CD11b<sup>+</sup>F4/80<sup>+</sup> cells are also quantified (n = 5 mice).

**c**, mRNA levels of indicated genes in different ATMs subgroups treated with vehicle or Dex (5 mg/kg) for 6 weeks (n = 6 mice).

**d**, *Klf9* mRNA levels of indicated AT treated with vehicle or Dex (5 mg/kg) for 6 weeks (n = 6 mice).

**e-g**, mRNA levels of polarization markers of mPMs (**e**), mBMDMs (**f**), and THP-1 (**g**) treated with Dex (100 nM) or vehicle for 16 h (n = 6 independent experiments).

**h, i**, KLF9 mRNA and protein levels in the mPMs (**h**) and hPBMC-MΦ (**i**) infected with LV-GFP or LV-Klf9 / LV-KLF9 for 24 h, then co-stimulated with IL-4 (20 ng/ml) and LPS (1 ng/ml) or vehicle for another 12 h (n = 6 independent experiments).

**j, k**, mRNA levels of indicated genes in the mPMs (**j**) and hPBMC-MΦ (**k**) infected with LV-GFP or LV-Klf9 / LV-KLF9 for 36 h (n = 6 independent experiments).

Data are represented as mean ± SEM., unpaired two-tailed Student's t tests were performed in **b, c, d, e, f, g, j**, and **k**, or one-way ANOVAs were performed in **h** and **i**.

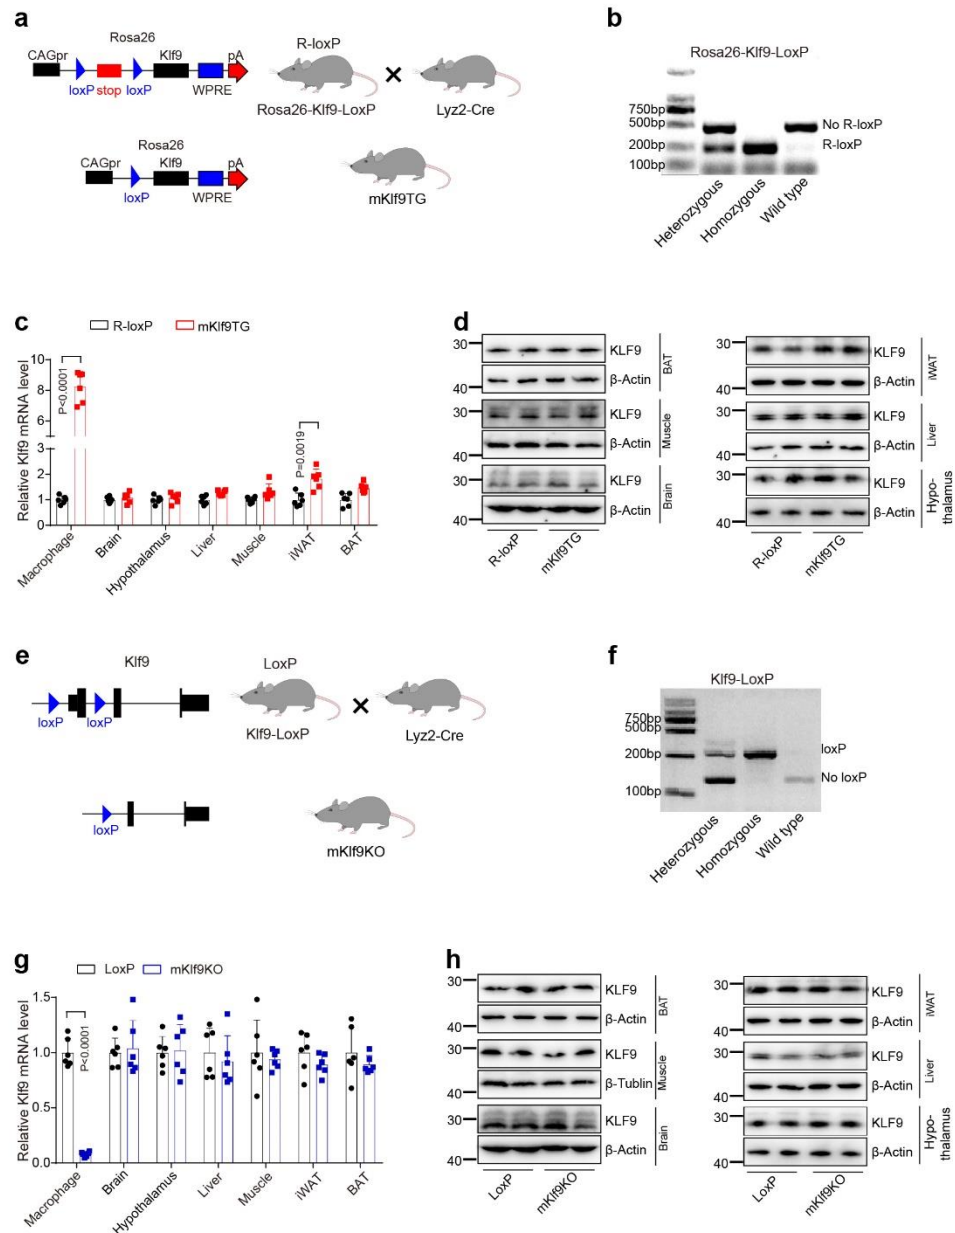

**Fig. S3: Generation and characterization of macrophage-specific *Klf9* transgene and knockout mice.**

**a**, Generation of mKlf9TG mice. Rosa26 *Klf9*<sup>fl<sub>ox</sub>/fl<sub>ox</sub></sup> mice were generated using the CRISPR/Cas9 system to insert the CAG-LoxP-STOP-LoxP-Klf9 cassette into the mouse *Rosa26* locus. These mice were subsequently bred with Lyz2-Cre transgenic mice to obtain mKlf9TG mice, leading to macrophage-specific *Klf9* overexpression.

**b**, PCR-based genotyping of mice.

**c, d**, KLF9 mRNA (**c**) and protein (**d**) levels in the indicated tissues from male R-loxP and mKlf9TG mice (n = 6 mice).

**e**, Generation of mKlf9KO mice. *Klf9*<sup>flox/flox</sup> mice were generated using CRISPR/Cas9 technology to insert two loxP sites into exon1 of the *Klf9* gene. These mice were subsequently bred with Lyz2-Cre transgenic mice to obtain mKlf9KO mice, leading to macrophage-specific *Klf9* abrogation.

**f**, PCR-based genotyping of mice.

**g, h**, KLF9 mRNA (**g**) and protein (**h**) levels in the indicated tissues from male LoxP and mKlf9KO mice (n = 6 mice).

Data are represented as mean  $\pm$  SEM., unpaired two-tailed Student's t tests were performed.



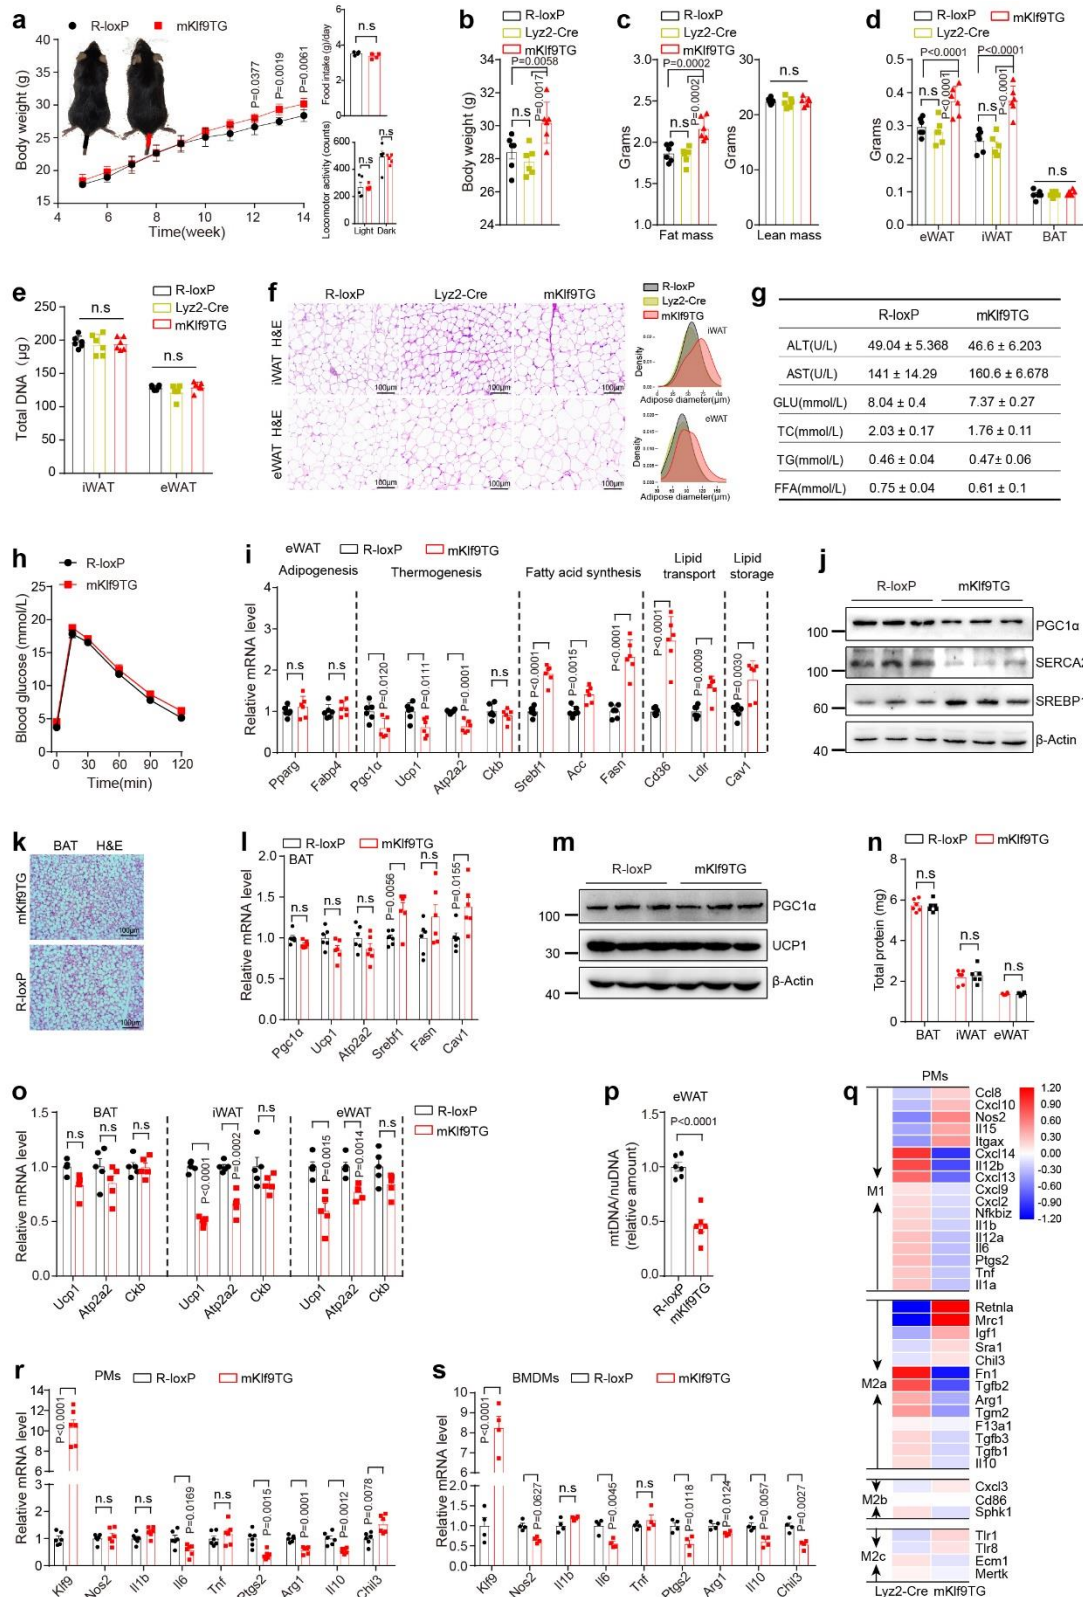

**Fig. S4: Myeloid *Klf9* transgene induces adiposity and macrophage deactivation.**

a, Body weight, food intake, and locomotor activity of male R-loxP and mKlf9TG mice fed an NCD for 14 weeks (n = 6 mice).



**b**, Body weight of 14-week-old male R-loxP, Lyz2-Cre, and mKlf9TG mice fed an NCD.

**c-e**, Fat and lean mass (**c**), AT weight (**d**), and total DNA content in iWAT and eWAT (**e**) of 14-week-old male R-loxP, Lyz2-Cre, and mKlf9TG mice (n = 6 mice).

**f**, H&E staining of iWAT and eWAT from male R-loxP, Lyz2-Cre, and mKlf9TG mice, scale bar = 100  $\mu$ m, quantification of adipocyte size of iWAT and eWAT are also shown. Representative images of three independent experiments with similar results.

**g**, Serum ALT, AST, GLU, TG, TC, and FFA contents of male R-loxP and mKlf9TG mice (n = 5 mice).

**h**, GTT results of male R-loxP (n = 6 mice) and mKlf9TG (n = 5 mice) mice.

**i, j**, mRNA (n = 6 mice) (**i**) and protein (**j**) levels of indicated genes in eWAT of male R-loxP and mKlf9TG mice.

**k**, Representative H&E staining of BAT from male R-loxP and mKlf9TG mice, scale bar = 100  $\mu$ m. Representative images of three independent experiments with similar results.

**l, m**, mRNA (n = 6 mice) (**l**) and protein (**m**) levels of indicated genes in BAT of male R-loxP and mKlf9TG mice.

**n**, Quantification of total protein per depot of indicated AT from male R-loxP and mKlf9TG mice (n = 6 mice).

**o**, mRNA levels indicated genes in indicated AT of male R-loxP and mKlf9TG mice during cold exposure (4°C) for 48h (n = 5 mice).

**p**, mtDNA copy number in eWAT of male R-loxP and mKlf9TG mice (n = 6 mice).

**q**, Heat map of indicated genes in PMs of male Lyz2-Cre and mKlf9TG mice.

**r, s**, mRNA levels of indicated genes in PMs (**r**) and BMDMs (**s**) from male R-loxP and mKlf9TG mice (n = 4 mice).

Data are represented as mean  $\pm$  SEM., unpaired two-tailed Student's t tests were performed in **a, g, h, i, l, n, o, p, r**, and **s**, or one-way ANOVAs were performed in **b-e**.

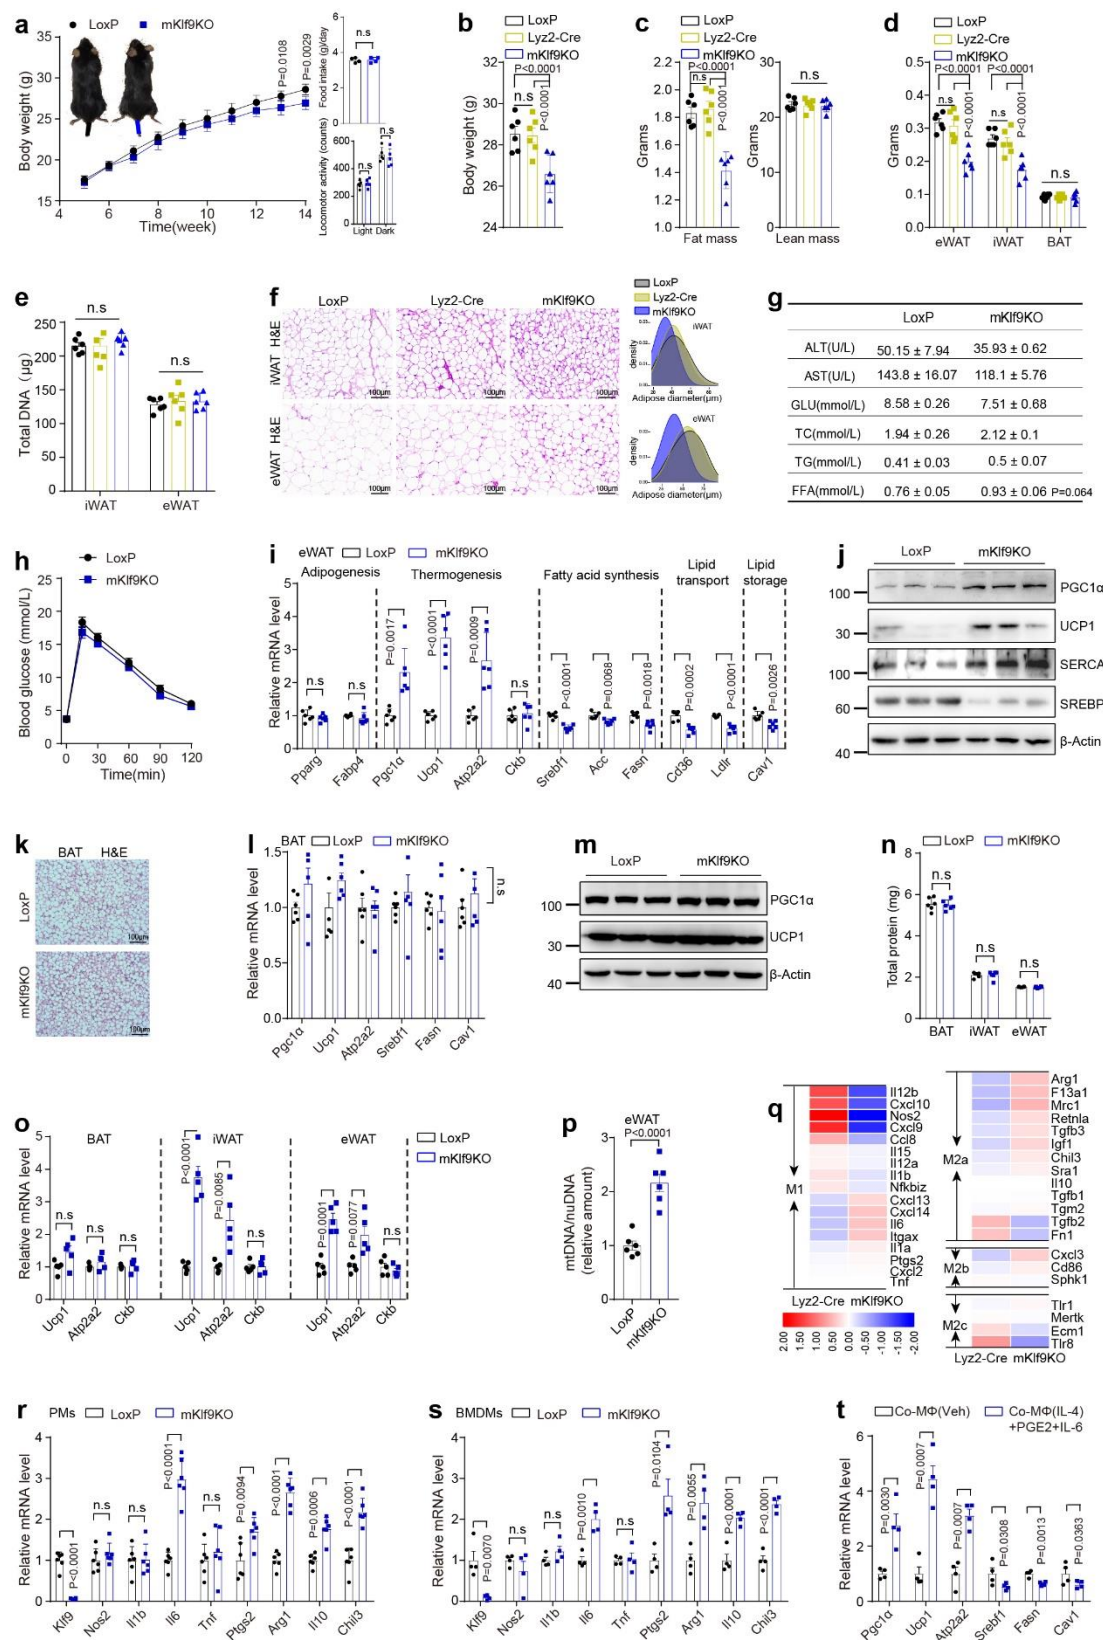

**Fig. S5: Myeloid *Klf9* abrogation attenuates obesity, stimulates M2a macrophage activation, and increases the production of IL-6 and PGE2.**

**a**, Body weight, food intake, and locomotor activity of male LoxP and mKlf9KO mice fed an NCD for 14 weeks (n = 6 mice).

**b**, Body weight of 14-week-old male LoxP, Lyz2-Cre, and mKlf9KO mice fed an NCD.

**c-e**, Fat and lean mass (**c**), AT weight (**d**), and total DNA content in iWAT and eWAT (**e**) of 14-week-old male LoxP, Lyz2-Cre, and mKlf9KO mice (n = 6 mice).

**f**, H&E staining of iWAT and eWAT from male LoxP, Lyz2-Cre, and mKlf9KO mice, scale bar = 100  $\mu$ m, quantification of adipocyte size are also shown. Representative images of three independent experiments with similar results.

**g**, Serum ALT, AST, GLU, TG, TC, and FFA contents of male LoxP and mKlf9KO mice (n = 5 mice).

**h**, GTT result of male LoxP (n = 5 mice) and mKlf9KO (n = 6 mice) mice.

**i, j**, mRNA (n = 6 mice) (**i**) and protein (**j**) levels of indicated genes in eWAT of male LoxP and mKlf9KO mice.

**k**, Representative H&E staining of BAT, scale bar = 100  $\mu$ m. Representative images of three independent experiments with similar results.

**l, m**, mRNA (n = 6 mice) (**l**) and protein (**m**) levels of indicated genes in BAT of male LoxP and mKlf9KO mice.

**n**, Total protein per depot of indicated AT of male LoxP and mKlf9KO mice (n = 6 mice).

**o**, mRNA levels of indicated genes in indicated AT of male LoxP and mKlf9KO mice during cold exposure (4°C) for 48h (n = 5 mice).

**p**, mtDNA copy number in eWAT of male LoxP and mKlf9KO mice (n = 6 mice).

**q**, Heat map of indicated genes in PMs of male Lyz2-Cre and mKlf9KO mice.

**r, s**, mRNA levels of indicated genes in PMs (**r**) and BMDMs (**s**) of male LoxP and mKlf9KO mice (n = 4 mice).

**t**, mRNA levels of the indicated genes in beige adipocytes treated with CM containing IL-6 (0.2 ng/ml) and PGE2 (1 $\mu$ M) from indicated macrophages stimulated with IL-4 (20 ng/ml) (n = 4 independent experiments).

Data are represented as mean  $\pm$  SEM., unpaired two-tailed Student's t tests were performed in **a, g, h, i, l, n, o, p**, and **r-t**, or one-way ANOVAs were performed in **b-e**.

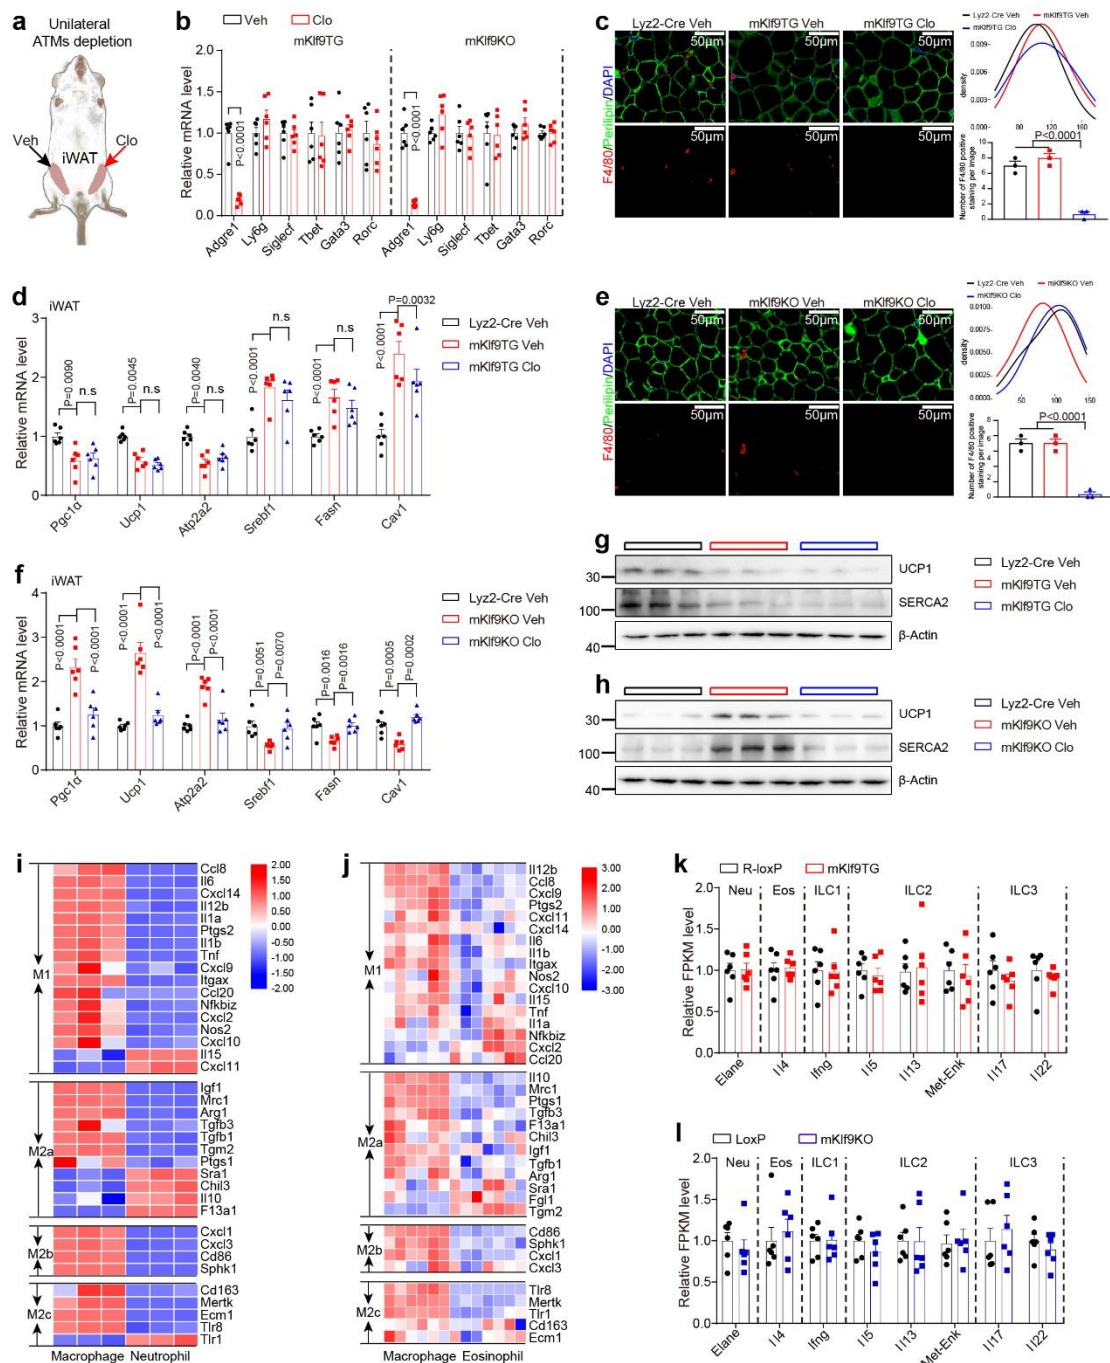

**Fig. S6: Macrophage KLF9 regulates white adipose tissue energy homeostasis.**

**a**, iWAT of 8-12 week-old mice was unilaterally delivered clodronate liposomes or control liposomes (Veh).

**b**, *Adgre1* (macrophages), *Ly6g* (neutrophils), *Siglec1* (eosinophils), *Tbet* (ILC1), *Gata3* (ILC2) and *Rorc* (ILC3) mRNA levels in iWAT of male mKlf9TG and mKlf9KO mice treated as in (a) (n = 6 mice).

**c**, Immunofluorescence staining of Perilipin-1 in iWAT of male Lyz2-Cre and mKlf9TG mice treated as in **(a)**, scale bar = 50  $\mu$ m, quantification of iWAT adipocyte size, and F4/80 positive staining per image are also shown (n = 3 mice). Representative images of three independent experiments with similar results.

**d, g**, mRNA (n = 6 mice) **(d)** and protein **(g)** levels of indicated genes in iWAT of male Lyz2-Cre and mKlf9TG mice treated as in **(a)**.

**e**, Immunofluorescence staining of Perilipin-1 in iWAT of male Lyz2-Cre and mKlf9KO mice treated as in **(a)**, scale bar = 50  $\mu$ m, quantification of iWAT adipocyte size, and F4/80 positive staining per image are also shown (n = 3 mice). Representative images of three independent experiments with similar results.

**f, h**, mRNA (n = 6 mice) **(f)** and protein **(h)** levels of indicated genes in iWAT of male Lyz2-Cre and mKlf9KO mice treated as in **(a)**.

**i**, Heat map representation of macrophage polarization markers in macrophages and neutrophils, data from GSE93735.

**j**, Heat map representation of macrophage polarization markers in macrophages and eosinophils, data from GSE112922.

**k**, mRNA levels of the indicated genes of iWAT from male R-loxP and mKlf9TG mice (n = 6 mice).

**l**, mRNA levels of the indicated genes of iWAT from male LoxP and mKlf9KO mice (n = 6 mice).

Data are represented as mean  $\pm$  SEM., unpaired two-tailed Student's t tests were performed in **b**, **k**, and **l**, one-way ANOVAs were performed in **c** and **e**, or two-way ANOVAs were performed in **d** and **f**.

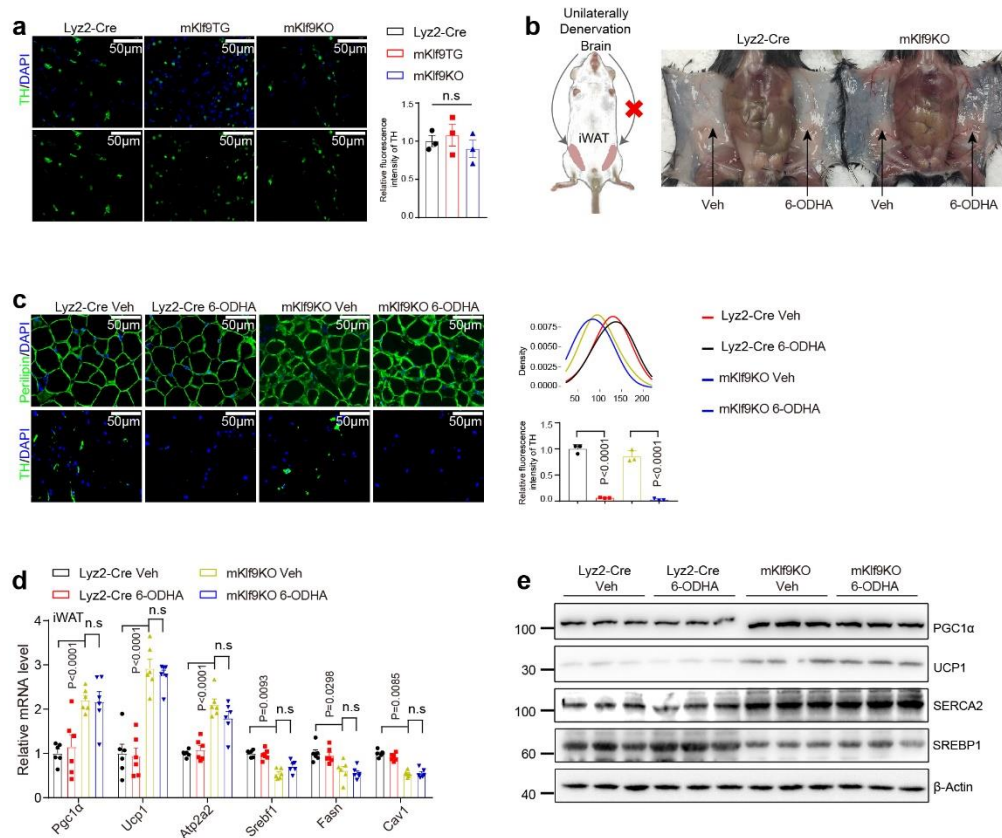

**Fig. S7: Macrophage KLF9 regulates adipose tissue energy homeostasis independently of the nervous system.**

**a**, Immunofluorescence staining of tyrosine hydroxylase (TH) in iWAT of male Lyz2-Cre, mKlf9TG, and mKlf9KO mice, scale bar = 50 μm, relative TH immunofluorescence intensity is also shown (n = 3 mice). Representative images of three independent experiments with similar results.

**b**, iWAT of 8-12 week old mice was unilaterally denervated (6-ODHA).

**c**, Immunofluorescence staining of Perilipin-1 and TH in iWAT of male Lyz2-Cre and mKlf9KO mice treated as in **(b)**, scale bar = 50 μm, quantification of iWAT adipocyte size, and relative TH immunofluorescence intensity are also shown (n = 3 mice). Representative images of three independent experiments with similar results.

**d, e**, mRNA **(d)** (n = 6 mice) and protein **(e)** levels of indicated genes in iWAT of male Lyz2-Cre and mKlf9KO mice treated as in **(b)**.



Data are represented as mean  $\pm$  SEM., one-way ANOVAs were performed in **a** and **c**, or two-way ANOVAs were performed in **d**.

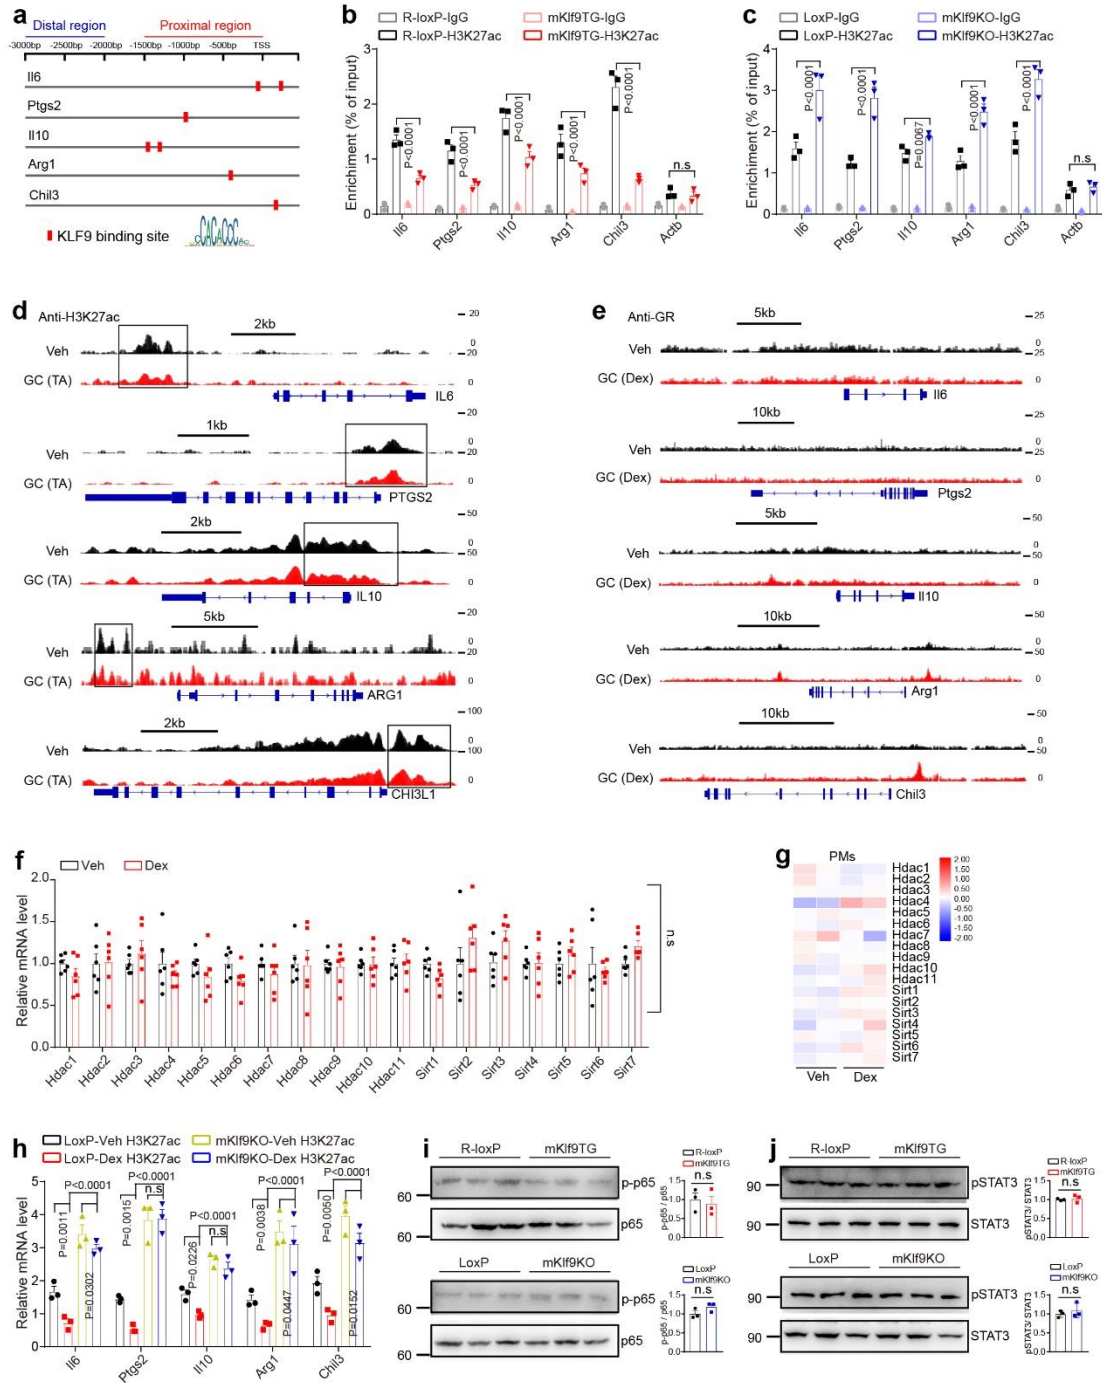

**Fig. S8: Glucocorticoids reduce histone acetylation levels in the promoter regions of the M1 and M2a macrophage-associated marker genes.**

**a**, KLF9 binding site analysis of indicated genes.

**b**, **c**, ChIP assay analysis of histone H3K27 acetylation levels in the promoters of indicated genes in mPMs from indicated mice co-stimulated with IL-4 (20 ng/ml) and LPS (1 ng/ml) for 12 h (n = 3 independent experiments).

**d**, Genome browser shots of H3K27ac ChIP-seq on indicated genes loci in MDMs treated with TA (1  $\mu$ M) or vehicle. Genomic coordinates in hg19, data from GSE109440.

**e**, Genome browser shots of GR ChIP-seq on indicated genes loci in mPMs treated with Dex (100 nM) or vehicle. Genomic coordinates in mm10, data from GSE109131.

**f**, mRNA levels of HDACs in mPMs treated with Dex or vehicle (n = 6 mice).

**g**, Heat map representation of HDACs expression in mPMs treated with Dex or vehicle, data from GSE93735.

**h**, ChIP assay showing the H3K27ac levels in the promoters of indicated genes in mPMs from indicated mice treated with Dex (100 nM) for 4 h and then co-stimulated with IL-4 (20 ng/ml) and LPS (1 ng/ml) for 12 h (n = 3 independent experiments).

**i, j**, p65 and STAT3 phosphorylation levels in the indicated mPMs.

Data are represented as mean  $\pm$  SEM., unpaired two-tailed Student's t tests were performed in **f**, **i**, and **j**, or one-way ANOVAs were performed in **b**, **c**, and **h**.

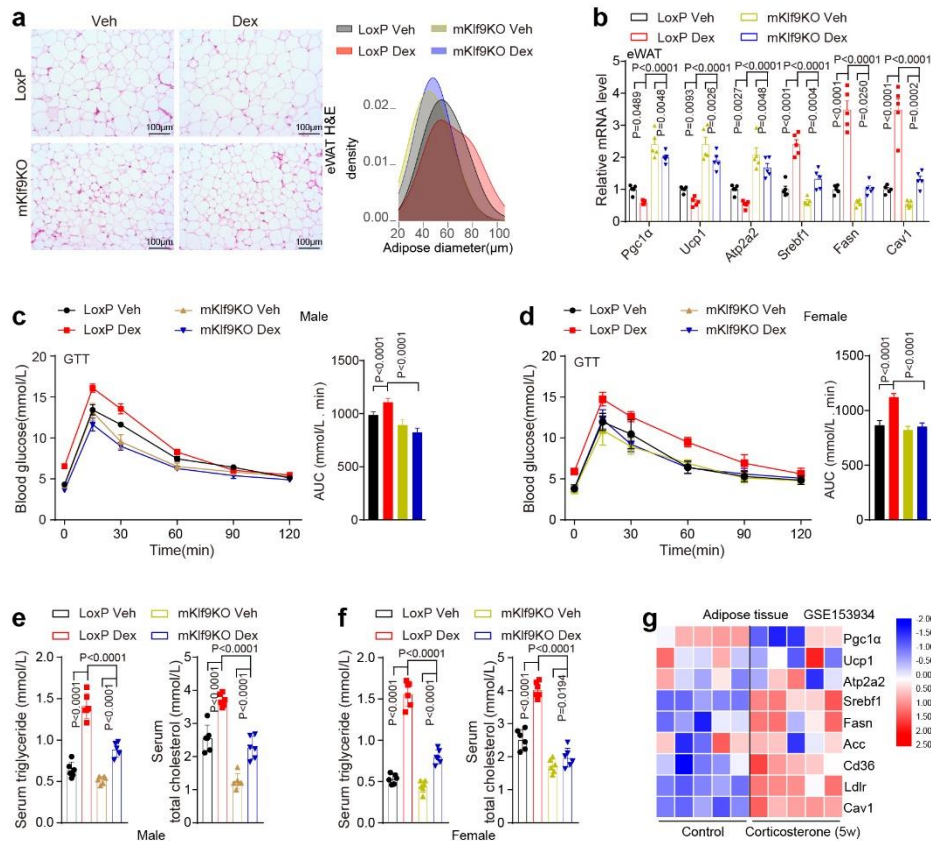

**Fig. S9: Myeloid *Klf9* ablation prevents Dex-induced metabolic disorder.**

**a**, Representative images of H&E staining of eWAT of male LoxP and mKlf9KO mice treated with vehicle or Dex (5 mg/kg) for 6 weeks (left), scale bar = 100  $\mu$ m, quantification of adipocyte size of eWAT is also shown (right). Representative images of three independent experiments with similar results.

**b**, mRNA levels of indicated genes in eWAT of male LoxP and mKlf9KO mice treated as in (a) (n = 4 mice).

**c, d**, GTT result of male (c) and female (d) LoxP and mKlf9KO mice treated as in (a), quantification of area under the curve (AUC) is also shown (n = 6 mice).

**e, f**, Serum TG (left) and TC (right) contents in male (e), female (f) LoxP and mKlf9KO mice treated as in (a) (n = 6 mice).

**g**, Heat map representation of indicated genes in visceral adipose tissue treated with Cort or vehicle, data from GSE153934.

Data are represented as mean  $\pm$  SEM., one-way ANOVAs were performed in **c, d, e** and **f**, or two-way ANOVAs were performed in **b**.

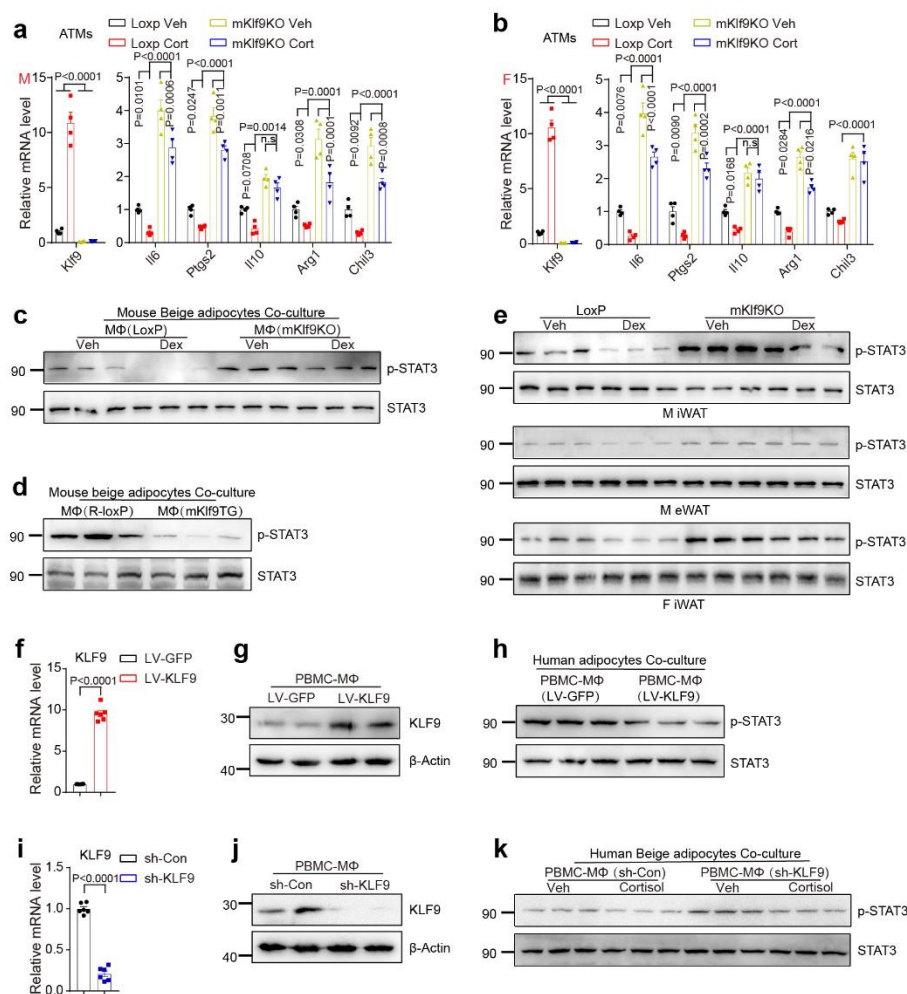

**Fig. S10: Macrophage KLF9 controls beige adipocyte STAT3 signaling pathway.**

**a, b**, mRNA levels of indicated genes in ATMs of male (**a**) and female (**b**) LoxP and mKlf9KO mice treated with 50 µg/mL Cort or corresponding vehicle (0.25% EtOH) in their drinking water for 6 weeks (n = 4 mice).

**c, d**, STAT3 phosphorylation in mouse beige adipocytes treated with CM from indicated mPMs.

**e**, STAT3 phosphorylation in iWAT and eWAT from male and female LoxP and mKlf9KO mice treated with Dex (5 mg/kg) or vehicle control for 6 weeks.

**f, g**, mRNA (n = 6 independent experiments) (**f**) and protein (**g**) levels of KLF9 in hPBMC-MΦ infected with LV-GFP or LV-KLF9 for 36 h.

**h**, STAT3 phosphorylation in human beige adipocytes treated with CM from hPBMC-MΦ pretreated with LV-KLF9 or LV-GFP for 24 h and then co-stimulated with IL-4 (20 ng/ml) and LPS (1 ng/ml) for another 12 h.

**i, j**, mRNA (n = 6 independent experiments) (**i**) and protein (**j**) levels of KLF9 in hPBMC-MΦ infected with sh-Con or sh-KLF9 for 36 h.

**k**, STAT3 phosphorylation in human beige adipocytes treated with CM from hPBMC-MΦ pretreated with sh-Con or sh-KLF9 for 24 h and then treated with cortisol (1 μM) or vehicle for another 4 h and then co-stimulated with IL-4 (20 ng/ml) and LPS (1 ng/ml) for another 12 h.

Data are represented as mean ± SEM., unpaired two-tailed Student's t tests were performed in **f** and **i**, one-way ANOVAs were performed in **a** (left) and **b** (left), or two-way ANOVAs were performed in **a** (right) and **b** (right).

### Supplementary Table 1

List of specific primers used for quantitative PCR gene expression analysis and ChIP analysis

| Primers for quantitative PCR analysis |                            |                            |
|---------------------------------------|----------------------------|----------------------------|
| Gene symbol                           | Forward primer (5'→3')     | Reverse primer (5'→3')     |
| <i>mKlf9</i>                          | GCACAAGTGCCCCTACAGT        | TGTATGCACTCTGTAATGGGCTTT   |
| <i>mPpargc1a</i>                      | TGATGTGAATGACTTGGATACAGACA | GCTCATTGTTGTACTGGTTGGATATG |
| <i>mUcp1</i>                          | AGGCTTCCAGTACCATTAGGT      | CTGAGTGAGGCAAAGCTGATTT     |
| <i>mAtp2a2</i>                        | ACCTTTGCCGCTCATTTTCCAG     | AGGCTGCACACACTCTTTACC      |
| <i>mCkb</i>                           | ATCGAGAAGCTGGCAGTAGA       | TGCTCCGCCTCAGTCATG         |
| <i>mSrebf1</i>                        | GGAGCCATGGATTGCACATT       | GGCCAGGGAAGTCACTGT         |
| <i>mAcc</i>                           | AGGAAGATGGCGTCCGCTCTG      | GGTGAGATGTGCTGGGTCAT       |
| <i>mFasn</i>                          | AGGGGTGCGACCTGGTCCTCA      | GCCATGCCCAGAGGGTGGTT       |
| <i>mCd36</i>                          | CCTCCAGAATCCAGACAACC       | CACAGGCTTTCCTTCTTTGC       |
| <i>mVldlr</i>                         | CTCCACCAACCTGCGGAGCC       | GCTGACGGCCACACTGCTCA       |
| <i>mCav1</i>                          | GACCCCAAGCATCTCAACGAC      | AGACAACAAGCGGTAAACCA       |
| <i>mNos2</i>                          | CCTCATGCCATTGAGTTCATC      | CCTGTTGTTTCTATTTCCTTTGTT   |
| <i>mIl1b</i>                          | TGAAGTTGACGGACCCCAAA       | TGATGTGCTGCTGCGAGATT       |
| <i>mIl6</i>                           | AGTTGCCTTCTTGGGACTGA       | TCCACGATTTCACAGAGAAC       |
| <i>mTnf</i>                           | CGTCAGCCGATTTGCTATCT       | CGGACTCCGCAAAGTCTAAG       |
| <i>mPtgs2</i>                         | GAGCACAGGATTTGACCAGTAT     | GGCTTCAGCAGTAATTTGATTC     |



|               |                              |                             |
|---------------|------------------------------|-----------------------------|
| <i>mIl10</i>  | TGGACAACATACTGCTAACC<br>GAC  | CCTGGGGCATCACTTCTACC        |
| <i>mArg1</i>  | GCATATCTGCCAAAGACATC<br>G    | TCTTCCATCACCTTGCCAAT<br>C   |
| <i>mChil3</i> | CATTGGAGGATGGAAGTTTG<br>GA   | GACGAAGGAATCTGATAAC<br>TGA  |
| <i>mElane</i> | ACTTCGTCATGTCAGCAGCC<br>CACT | GCTCCTGTCGCCGCAGGTCA        |
| <i>mIl4</i>   | AGACTCTTTCGGGCTTTTCG         | TGATGCTCTTTAGGCTTTCC        |
| <i>mIfng</i>  | CAAGTGGCATAGATGTGGAA         | TAATCTGGCTCTGCAGGATT        |
| <i>mIl5</i>   | ATGAGCACAGTGGTGAAAG<br>A     | TATGAGTAGGGACAGGAAG<br>C    |
| <i>mIl13</i>  | GTGCAACGGCAGCATGGTAT         | GGAGATGTTGGTCAGGGAA<br>T    |
| <i>mIl33</i>  | GGAAAGAACCCACGAAAAG<br>A     | CTAGAATCCCGTGGATAGGC        |
| <i>mPenk</i>  | CGCCCAGGCGACATCAATTT         | TCCTTGCAGGTCTCCCAGAT        |
| <i>mIl17</i>  | AGACTACCTCAACCGTTCCA         | GAGCTTCCCAGATCACAGA<br>G    |
| <i>mIl22</i>  | AAACTGTTCCGAGGAGTCAG         | AGAACGTCTTCCAGGGTGA<br>A    |
| <i>mHdac1</i> | GGGCACCAAGAGGAAAGTC          | GCAAATTGTGAGTCATGCG         |
| <i>mHdac2</i> | AACTTGCTGCTAAATTATGG<br>TTT  | ACTTGATATACTCATCGCTG<br>TGG |
| <i>mHdac3</i> | CGTATTTCTACGACCCCGAT         | GGCTATGAGTCAATGCCAG<br>G    |
| <i>mHdac4</i> | ACAAGGAGAAGGGCAAAGA<br>G     | GGAAATGCAGTGGTTCAGG<br>T    |
| <i>mHdac5</i> | AATCCTGCCACGGACTCCT          | GCTACCTCCACCTCCACCC         |
| <i>mHdac6</i> | ATTCCTGTTGTCCAAGTCAA<br>A    | ACTCTGGTCCAAAGAAGCGT<br>G   |
| <i>mHdac7</i> | CAATAAAGACAAGAGCAAG<br>CG    | GATGGACTGTTCTCTCAAGG<br>G   |

|                |                              |                              |
|----------------|------------------------------|------------------------------|
| <i>mHdac8</i>  | CGGTTTATATTTACAGTCCC<br>G    | GCATAGGCTTCGATCAGAG<br>AG    |
| <i>mHdac9</i>  | TCAAGATAGCAAGGATGATT<br>TC   | ACTTTCTGTTTTAACCTGGA<br>CC   |
| <i>mHdac10</i> | AGGAAGAGTTGGGCTTGGTG         | TGCTTAGACAGTGCGTGGAG         |
| <i>mHdac11</i> | GGAAATGGGGCAAGGTGAT          | CAGCAGGTCCTCCTCCGAG          |
| <i>mSirt1</i>  | GTATTTTAGAAAAGACCCAA<br>GACC | GTATTTTAGAAAAGACCCAA<br>GACC |
| <i>mSirt2</i>  | GATTCAGACTCGGACACTGA<br>GG   | TCGTCTAGAAGACGCTCCTT<br>TT   |
| <i>mSirt3</i>  | GTAGGGTGGTGGTCATGGTG         | CTGAAGGTTGCTGTAGAGGC         |
| <i>mSirt4</i>  | CGTGGACGCTTTGCACTCC          | TGCTCCCCACAGTTCAGGC          |
| <i>mSirt5</i>  | GCCTCCCCACAAAGCAAGAT         | TGGCGTTCGCAAAACACTTC         |
| <i>mSirt6</i>  | ACCATTCTGGACTGGGAGGA         | GGTGACAGACAGGTCTGCG<br>G     |
| <i>mSirt7</i>  | AGGCACTTGGTTGTCTACAC<br>G    | CATACTCCATTAGGACCCCG<br>A    |
| <i>m36B4</i>   | GAGGAATCAGATGAGGATAT<br>GGGA | AAGCAGGCTGACTTGGTTGC         |
| <i>hNOS2</i>   | AGAGGACCCAGGGACAAGC<br>C     | TTGTTTCTATCTCCTTTGTTA<br>CCG |
| <i>hIL1B</i>   | TGACCTGAGCACCTTCTTTCC        | GCACATAAGCCTCGTTATCC<br>C    |
| <i>hIL6</i>    | GGCAGAAAACAACCTGAAC<br>CT    | AACTCCAAAAGACCAGTGA<br>TG    |
| <i>hTNF</i>    | CACGCTCTTCTGCCTGCTG          | GGCTTGTCACTCGGGGTTC          |
| <i>hPTGS2</i>  | AACTCTGGCTAGACAGCGTA<br>A    | AACCGTAGATGCTCAGGGA<br>C     |
| <i>hARG1</i>   | AAGGGACAGCCACGAGGAG          | TGTCAGCAAAGGGCAGGTC          |
| <i>hIL10</i>   | TGTAAAGGAGTCCTTGCTG<br>G     | CTTGATGTCTGGGTCTTGGT<br>T    |
| <i>hKLF9</i>   | TCCTCCCATCTCAAAGCCCA<br>TTA  | ACAGCGGACAGCGGAAGT<br>C      |

|                  |                             |                            |
|------------------|-----------------------------|----------------------------|
| <i>hPPARGC1A</i> | GAACAAGACTATTGAACGCA<br>CCT | CTTGGTTGGCTTTATGAGGA<br>G  |
| <i>hUCP1</i>     | CTCAGGATCGGCCTCTACG         | CTTTCACGACCTCTGTGGG        |
| <i>hATP2A2</i>   | CTTGCTGGAACCTTGTGATTG       | CAAAGGCTGTAATTGTTTCT<br>TC |
| <i>hSREBF1</i>   | AGCTTCTCCATCAGTTCCAG<br>C   | TCAGAGAGGCCCACCACTTG       |
| <i>hFASN</i>     | GTCACCATCTCGGGACCTCA        | GCACCTCCTTGGCAAACAC        |
| <i>hCAV1</i>     | GCGACCCTAAACACCTCAA         | CTTCCAAATGCCGTCAAAA        |
| <i>h36B4</i>     | GTGTTACCAAGGAGGACC          | TGGCACAGTGAAGTTCACATG      |

#### Primers for ChIP analysis

|                                            |                                |                               |
|--------------------------------------------|--------------------------------|-------------------------------|
| <i>mIl6</i> AceH3<br>(-622 to -531)        | TTGGAGGTGAACAAACCATT<br>AG     | ACCCAACCTGGACAACAGA<br>CAG    |
| <i>mPigs2</i><br>AceH3<br>(-487 to -304)   | GAAAGACTTCAACCTAATTC<br>CACCAG | GGGATCTAAGGTCCTAACTA<br>AGGGA |
| <i>mIl10</i> AceH3<br>(-187 to -73)        | CATTCCGACCAGTTCTTTAG<br>CG     | CAGGCTCCTCCTCCCTCTTC<br>TA    |
| <i>mArg1</i><br>AceH3<br>(-797 to -662)    | ATTGCTCCGTTTCGATTCTTC<br>T     | GTGTGCCAAGTGCTATTCTA<br>GTAA  |
| <i>mChil3</i><br>AceH3<br>(-149 to -46)    | TGACTGAACTGGTGATAAAA<br>GGTG   | AATGGGAAGTTTGGAAAAG<br>GAA    |
| <i>mIl6</i> KLF9<br>(-218 to -55)          | GTGCTCATGCTTCTTAGGGC<br>TAG    | AAATCTTTGTTGGAGGGTGG<br>G     |
| <i>mPigs2</i> KLF9<br>(-1094 to -<br>1008) | ATTCACGCCAAGAACGTACA<br>GT     | TGTGAGGATGGAGTAGCGA<br>AAA    |
| <i>mIl10</i> KLF9<br>(-1379 to -<br>1195)  | GAAAGTGAAAGGGATGGAG<br>GC      | GCTGGCAGATCAGGATCAA<br>GG     |

|                                        |                            |                            |
|----------------------------------------|----------------------------|----------------------------|
| <i>mArg1</i> KLF9<br>(-545 to -419)    | TGTCAGGGAAATAAATGATG<br>C  | CCAGGTTACACTGTCTAGGA<br>AA |
| <i>mChil3</i> KLF9<br>(+39 to +179)    | GAACTTCAGTCTTGCATGGT<br>T  | TTCCTGTTATGGCTGTGGTA<br>C  |
| <i>mIl6</i> KLF9<br>(-2667 to -2864)   | CTCCCATAATCAAATGCCAA<br>TC | TACAACATAACGCTATCCTT<br>C  |
| <i>mPtgs2</i> KLF9<br>(-2080 to -2038) | CATCTTGATTTGGTTTGGGA<br>CA | AAATTCAGACCTGGAGGAC<br>AA  |
| <i>mIl10</i> KLF9<br>(-2554 to -2608)  | TTGAATCCGCAGCTCCGACA<br>G  | GCTGGGTTTCAGGACAAGG<br>GA  |
| <i>mArg1</i> KLF9<br>(-2559 to -2782)  | TTGTGCCACTTTGGGTTGAG       | GTTCTCCTTCAGGCGACCAT       |
| <i>mChil3</i> KLF9<br>(-2392 to -2555) | TTTTGACCAATTCCTCCTT        | GATGGCACTTATGCTGATGT       |
